# Supplementary material for: Prognostic Implications of CD14 Antigen Expression in De Novo Acute Myeloid Leukemia
Source: Research Square preprint supplement (doi:10.21203/rs.3.rs-7500517/v1), 2025-10-06
Supplement: Supplementary file 1 [file 84702ca1fd2f289a6d71e367.docx]

Table S1: Antibody Panel for Leukemia Immunophenotyping

| Target | Clone | Fluorochrome | Vendor | Cat. | No. | Dilution |
| --- | --- | --- | --- | --- | --- | --- |
| CD3 | SK7 | APC-Cy7 | BD | Biosciences | 557832 | 1:20 |
| CD7 | M-T701 | FITC | BD | BioLegend | 343104 | 1:30 |
| CD10 | HI10a | PE-Cy7 | BD | Biosciences | 561004 | 1:25 |
| CD13 | L138 | APC | BD | BioLegend | 301710 | 1:50 |
| CD14 | M5E2 | PerCP-Cy5.5 | BD | Biosciences | 561708 | 1:40 |
| CD15 | MMA | FITC | BD | BioLegend | 323006 | 1:20 |
| CD19 | SJ25C1 | BV421 | BD | Biosciences | 562440 | 1:10 |
| CD33 | P67.6 | PE | BD | Biosciences | 555450 | 1:30 |
| CD34 | 8G12 | BV510 | BD | BioLegend | 343622 | 1:15 |
| CD45 | **HI30** | FITC | BD | BioLegend | 304006 | 1:20 |
| CD56 | NCAM16.2 | PE-Cy7 | BD | Biosciences | 335809 | 1:25 |
| CD65 | 88H7 | FITC | Beckman | Coulter | IM0463U | 1:30 |
| CD117 | 104D2 | APC-Cy7 | BD | BioLegend | 313216 | 1:20 |
| Isotype | Ctrl | MOPC-21 | BD | BioLegend | 400154 | matched |
